# Supplementary material for: Health Systems Strengthening Interventions for Perinatal Common Mental Disorders and Experiences of Domestic Violence in Cape Town, South Africa: Protocol for a Pilot Implementation Study
Source: Research Square preprint supplement (doi:10.21203/rs.3.rs-956295/v1), 2021-10-18
Supplement: Supplementary file 1 [file 021b65452488e280c535e5b7.docx]

**Supplementary file 1**: Overview of study designs used during the Pre-Implementation Phase

| **Study design** | **Objectives** | **Data collection tools** | **Setting** | **Participants** |
| --- | --- | --- | --- | --- |
| Situation Analysis | Assess governance, organisation and leadership of care processes; healthcare worker numbers, roles, skills and competencies; availability and use of policies and guidelines; patient flow through the health system; availability and functionality of essential equipment; availability of essential drugs; functioning of the health system information management system, and to assess routinely collected data | Adapted version of the situation analysis tool developed by the Programme for Improving Mental Health Care (PRIME) [24] | Four purposively selected midwife obstetric units (MOUs) in the Cape Metropolitan health district and 10 not-for profit organisations (NPOs) providing community- and facility-based support to the MOUs | 12 facility- and community-based managers employed by the Department of Health (DoH) or supporting NPOs |
| Qualitative healthcare worker interviews | Assess healthcare worker roles and attitudes to detecting, referring and treating pregnant women with CMDs and experiences of domestic violence; thoughts on the acceptability and feasibility of providing a routine screening and counselling service for pregnant women | Semi-structured interview guide | Four purposively selected midwife obstetric units (MOUs) and 10 not-for profit organisations (NPOs) providing community- and facility-based support to them in the Cape Metropolitan health district | 37 facility- and community-based healthcare workers employed by the Department of Health (DoH) or supporting NPOs |
| Quantitative patient survey | Assess the prevalence of CMDs and experiences of domestic violence in pregnant women | Bespoke questionnaire to collect socio-demographic information  Edinburgh postnatal depression scale [25]  Validated psychological distress screening tool [12]  Bespoke screening tool to collect information on experiences of domestic violence | Four purposively selected midwife obstetric units (MOUs) in the Cape Metropolitan health district | 156 pregnant women attending the MOUs for their first antenatal visit |
| Qualitative patient interviews | Assess experiences of depression, anxiety and domestic violence; perceived reasons for experiencing psychological distress; thoughts on the acceptability and feasibility of a routine screening and counselling service for pregnant women | Semi-structured interview guide | Four purposively selected midwife obstetric units (MOUs) in the Cape Metropolitan health district | 38 pregnant women attending the MOU for their first antenatal visit |
